# Supplementary material for: The selective separation of thorium from uranyl ions using ultrasonic-assisted solidified floating organic drop microextraction
Source: Royal Society of Chemistry journal article supplement (doi:10.1039/d1ja00098e), 2021-01-01
Supplement: d1ja00098e1.pdf [file d1ja00098e1.pdf]

## Supplementary materials

### Selective separation of thorium from uranyl ions using ultrasonic-assisted solidified floating organic drop microextraction

Ghada G. El-Gamal <sup>a</sup>, Wael I. Mortada <sup>b,\*</sup>, Mohamed M. Hassanien <sup>c</sup>, Amr A. Ibrahim <sup>a</sup>,  
Yasmeen G. Abou El-Reash <sup>a</sup>

<sup>a</sup> Chemistry Department, Faculty of Science, Mansoura University, Mansoura, Egypt

<sup>b</sup> Urology and Nephrology Center, Mansoura University, Mansoura, Egypt

<sup>c</sup> Chemistry Department, Industrial Education College, Beni-Suef University, Beni-Suef, Egypt

\* Corresponding author:

Dr. Wael I. Mortada,

Urology and Nephrology Center, Mansoura University, Mansoura 35516, Egypt,

E-mail: [w.mortada@mans.edu.eg](mailto:w.mortada@mans.edu.eg)

**Table S1** Instrumental parameters for the determination of Th by ICP-OES

---

|                                                |            |
|------------------------------------------------|------------|
| RF power (W)                                   | 1200       |
| Plasma gas flow rate (L min <sup>-1</sup> )    | 12         |
| Auxiliary gas flow rate (L min <sup>-1</sup> ) | 1          |
| Nebulizer gas flow rate (L min <sup>-1</sup> ) | 0.7        |
| Delay time (s)                                 | 15         |
| Integration time (s)                           | 3          |
| Replicates                                     | 3          |
| Wavelength (nm)                                | Th 283.730 |

---
